# Supplementary material for: DNA binding by pixantrone
Source: Royal Society of Chemistry journal article supplement (doi:10.1039/c0ob00295j), 2010-01-01
Supplement: c0ob00295j.pdf [file c0ob00295j.pdf]

## Supplementary Information

### DNA binding by pixantrone

Najia Adnan<sup>a</sup>, Damian P. Buck<sup>a</sup>, Benny J. Evison<sup>b</sup>, Suzanne M. Cutts<sup>b\*</sup>,  
Don R. Phillips<sup>b</sup> and J. Grant Collins<sup>a\*</sup>

- |                                           |                                                                                                                                                                                                    |
|-------------------------------------------|----------------------------------------------------------------------------------------------------------------------------------------------------------------------------------------------------|
| <b>Supplementary Information Table 1</b>  | <sup>1</sup> H NMR assignments of the resonances of free d(ACGATCGT) <sub>2</sub> and with added pixantrone at R = 0.6                                                                             |
| <b>Supplementary Information Table 2</b>  | <sup>1</sup> H NMR assignments of the resonances of free d(A <sup>5Me</sup> CGAT <sup>5Me</sup> CGT) <sub>2</sub> and with added pixantrone at R = 2.0                                             |
| <b>Supplementary Information Figure 1</b> | Models of two pixantrone molecules intercalated into the symmetric 5'-CG or 5'- <sup>5Me</sup> CG sites in d(ACGATCGT) <sub>2</sub> and d(A <sup>5Me</sup> CGAT <sup>5Me</sup> CGT) <sub>2</sub> . |

**Supplementary Information Table 1**  $^1\text{H}$  NMR assignment of the DNA resonances of  $d(\text{ACGATCGT})_2$  with added pixantrone, at  $R = 0.6$  molar ratio in pH 7 phosphate buffer at 25 °C. Changes in chemical shift upon pixantrone binding are given in brackets, with a negative sign indicating an upfield shift.

| Residue              | H8/H6           | H2/H5           | H1'             | H2'             | H2''            | Methyl          |
|----------------------|-----------------|-----------------|-----------------|-----------------|-----------------|-----------------|
| <b>A<sub>1</sub></b> | 8.17<br>(-0.05) | 7.87<br>(-0.16) | 6.13<br>(-0.10) | 2.58<br>(-0.05) | 2.76<br>(-0.01) |                 |
| <b>C<sub>2</sub></b> | 7.38<br>(-0.02) | 5.35<br>(-0.10) | 5.35<br>(-0.02) | 2.11<br>(0.01)  | 2.32<br>(-0.03) |                 |
| <b>G<sub>3</sub></b> | 7.88<br>(-0.02) |                 | 5.62<br>(-0.07) | 2.68<br>(-0.03) | 2.79<br>(-0.03) |                 |
| <b>A<sub>4</sub></b> | 8.18<br>(-0.04) | 7.77<br>(-0.05) | 6.23<br>(-0.06) | 2.60<br>(-0.05) | 2.92<br>(-0.06) |                 |
| <b>T<sub>5</sub></b> | 7.12<br>(-0.04) |                 | 5.89<br>(-0.04) | 1.99<br>(-0.04) | 2.42<br>(-0.01) | 1.30<br>(-0.06) |
| <b>C<sub>6</sub></b> | 7.40<br>(-0.02) | 5.54<br>(-0.06) | 5.72<br>(-0.01) | 1.94<br>(-0.01) | 2.36<br>(0.00)  |                 |
| <b>G<sub>7</sub></b> | 7.94<br>(-0.03) |                 | 5.98<br>(-0.09) | 2.62<br>(-0.06) | 2.72<br>(0.03)  |                 |
| <b>T<sub>8</sub></b> | 7.34<br>(-0.07) |                 | 6.18<br>(-0.05) | 2.26<br>(-0.01) | 2.26<br>(-0.01) | 1.54<br>(-0.10) |

**Supplementary Information Table 2**  $^1\text{H}$  NMR assignment of the DNA resonances of  $d(\text{A}^{5\text{Me}}\text{CGAT}^{5\text{Me}}\text{CGT})_2$  with added pixantrone at  $R = 2$  in pH 7 phosphate buffer at 25 °C. Changes in chemical shift upon pixantrone binding are given in brackets, with a negative sign indicating an upfield shift.

|                        | <b>H8/H6</b>    | <b>H2</b>       | <b>H1'</b>      | <b>H2'</b>      | <b>H2''</b>     | <b>Methyl</b>   |
|------------------------|-----------------|-----------------|-----------------|-----------------|-----------------|-----------------|
| <b>A<sub>1</sub></b>   | 8.18<br>(-0.02) | 7.99<br>(-0.04) | 6.11<br>(-0.10) | 2.48<br>(-0.08) | 2.76<br>(-0.05) |                 |
| <b>C<sub>2</sub>Me</b> | 7.21<br>(-0.02) |                 | 5.80<br>(0.43)  | 2.21<br>(-0.10) | 2.30<br>(-0.04) | 1.43<br>(-0.15) |
| <b>G<sub>3</sub></b>   | 7.92<br>(0.03)  |                 | 5.45<br>(-0.18) | 2.67<br>(-0.06) | 2.72<br>(-0.00) |                 |
| <b>A<sub>4</sub></b>   | 8.21<br>(-0.03) | 7.78<br>(-0.07) | 6.20<br>(-0.10) | 2.64<br>(-0.03) | 2.84<br>(-0.11) |                 |
| <b>T<sub>5</sub></b>   | 7.07<br>(-0.11) |                 | 5.88<br>(-0.07) | 1.67<br>(-0.26) | 2.39<br>(-0.13) | 1.23<br>(-0.14) |
| <b>C<sub>6</sub>Me</b> | 7.29<br>(0.02)  |                 | 5.83<br>(0.20)  | 2.08<br>(-0.01) | 2.36<br>(0.04)  | 1.59<br>(-0.14) |
| <b>G<sub>7</sub></b>   | 7.96<br>(-0.02) |                 | 5.96<br>(-0.11) | 2.67<br>(-0.04) | 2.76<br>(0.02)  |                 |
| <b>T<sub>8</sub></b>   | 7.30<br>(-0.10) |                 | 6.18<br>(-0.07) | 2.23<br>(-0.02) | 2.23<br>(-0.02) | 1.43<br>(-0.18) |

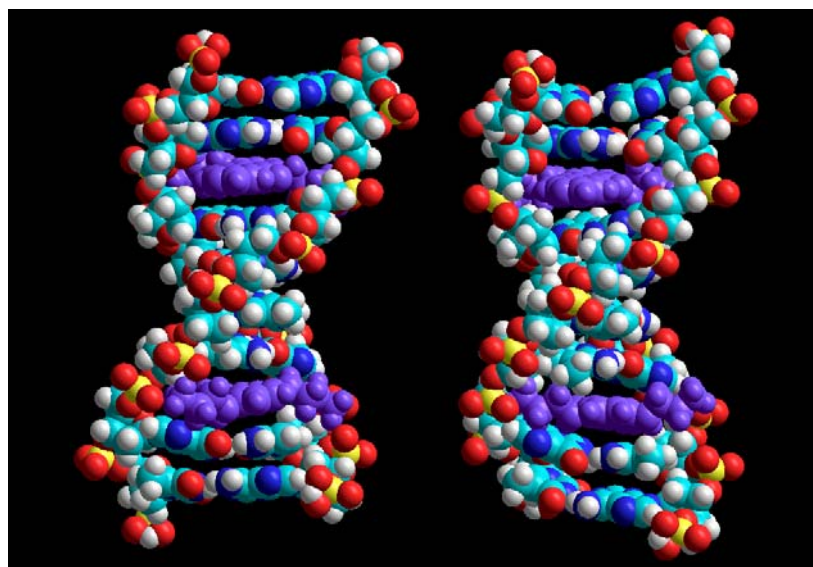

**Supplementary Information Figure 1** Energy minimised HyperChem models of two pixantrone molecules intercalated into the symmetric 5'-CG or 5'-<sup>5Me</sup>CG sites in d(ACGATCGT)<sub>2</sub> (left-hand side) and d(A<sup>5Me</sup>CGAT<sup>5Me</sup>CGT)<sub>2</sub> (right-hand side). The pixantrone intercalative-binding is shown from the minor groove (top) and the major groove (bottom).
